# Supplementary material
Source: publisher site journal article supplement (https://www.spandidos-publications.com/5069/downloadSupplementary)

Figure S1. (A and B) The transfection efficiency of AGMAT in HCT116 cells transfected with the overexpression AGMAT plasmids were determined using RT-qPCR and western blotting. \*\* $P < 0.01$  vs. Vector. (C and D) The transfection efficiency of AGMAT in SW480 cells transfected with the knockdown AGMAT plasmids were determined using RT-qPCR and western blotting. \* $P < 0.05$  and \*\* $P < 0.01$  vs. shNC. All data are expressed as the mean  $\pm$  SD (n=3). AGMAT, agmatinase; RT-qPCR, reverse transcription-quantitative PCR; OE, overexpression; sh-, short hairpin; NC, negative control.

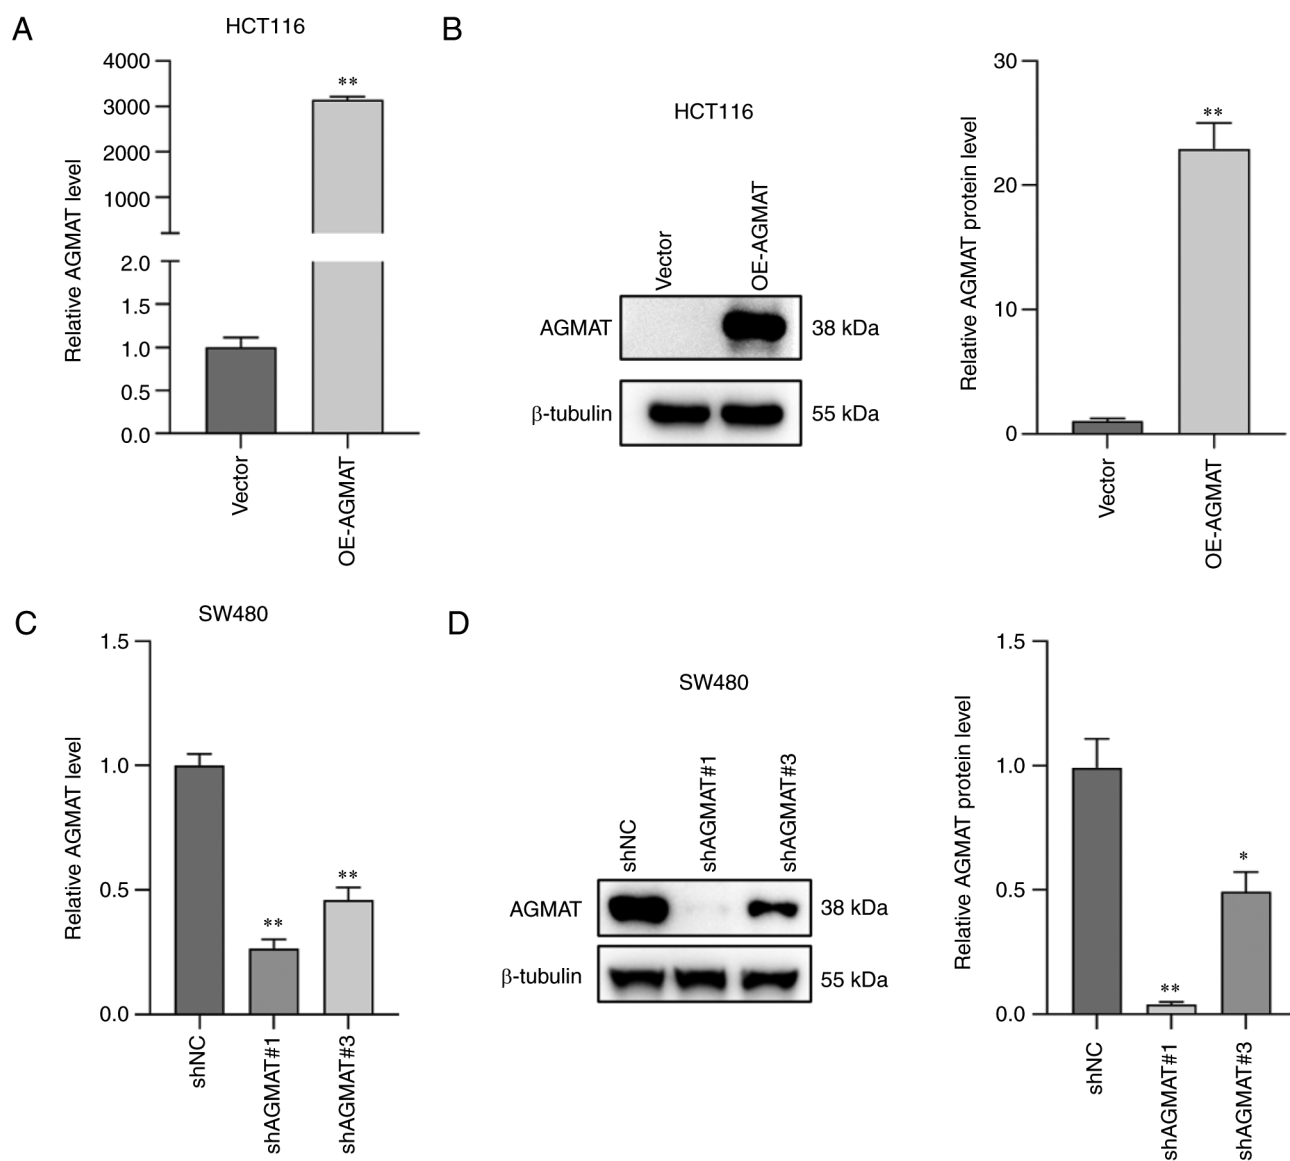

Supplement: Supplementary file 1 [file downloadSupplementary]
